# Supplementary material
Source: PubMed Central journal article supplement (PMC1523242)

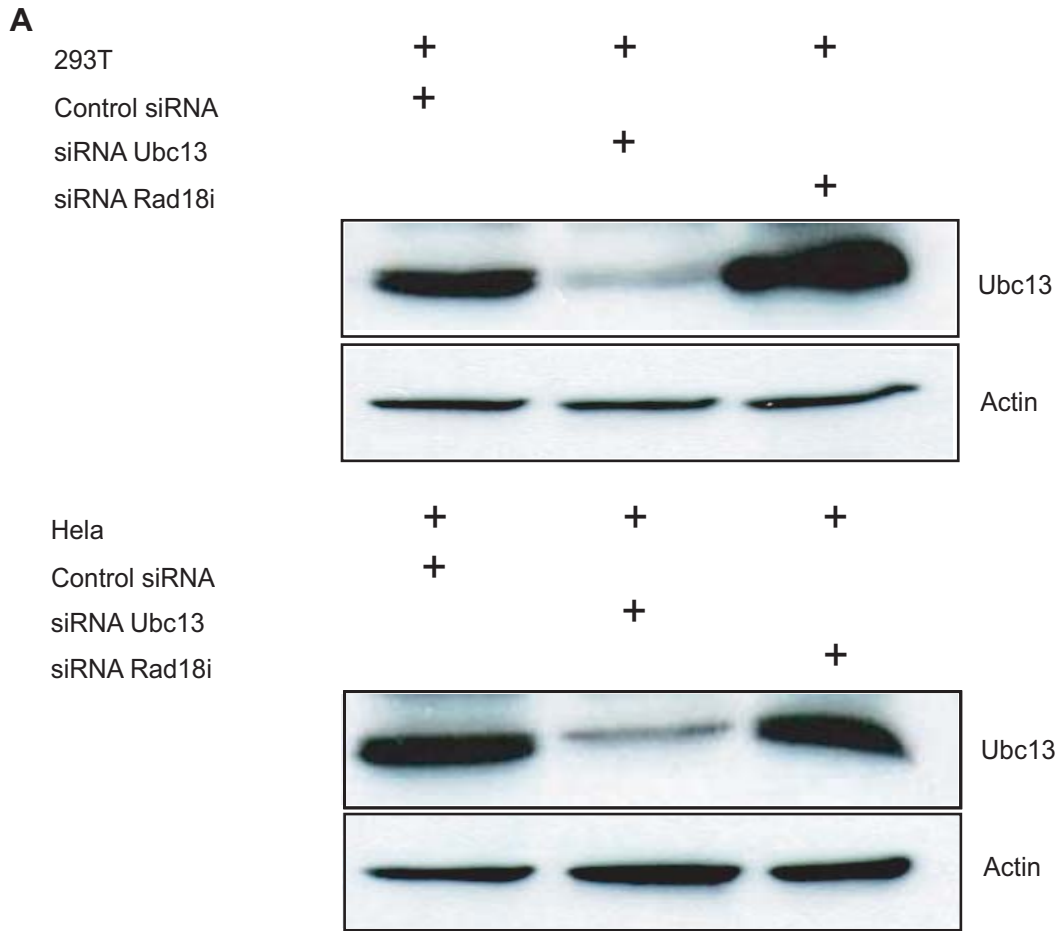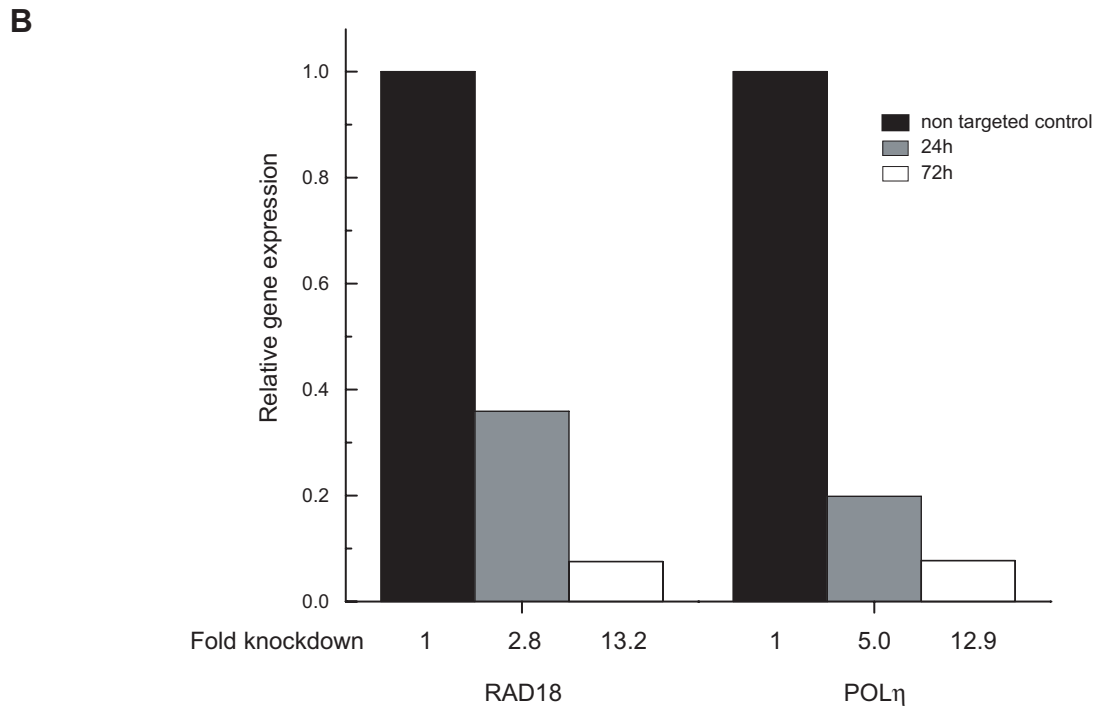

Supplemental Figure S1 *Chiu et al*

Supplement: pgen.0020116.sg001.pdf [file pgen.0020116.sg001.pdf]

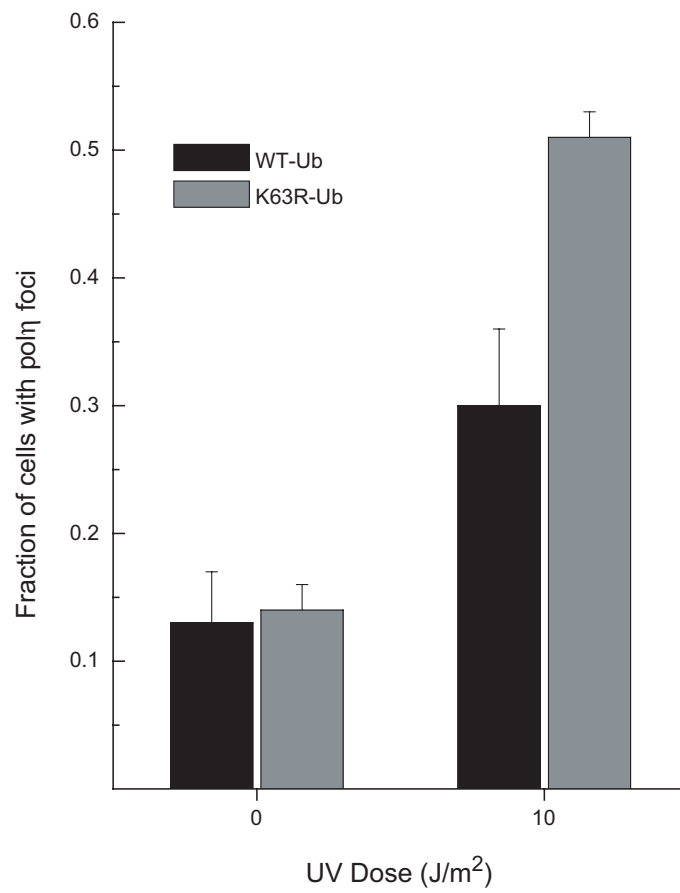

Supplementary Information Figure S2 *Chiu et al*

Supplement: pgen.0020116.sg002.pdf [file pgen.0020116.sg002.pdf]

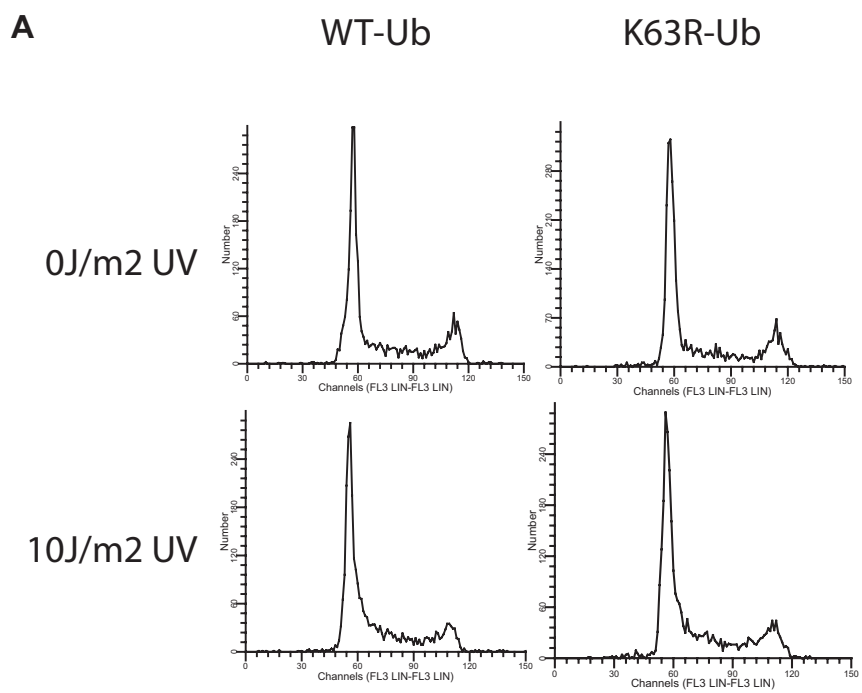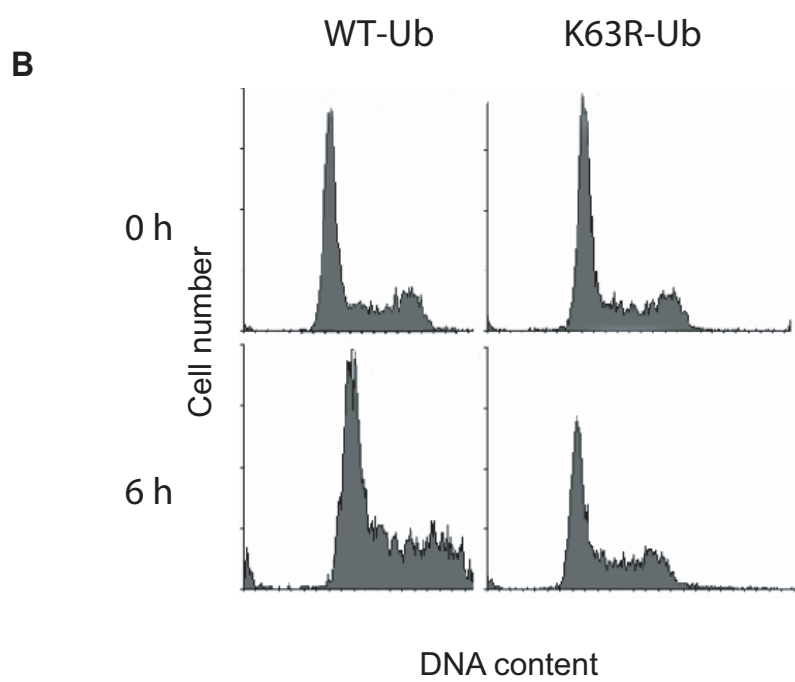

Supplemental Figure S3 *Chiu et al*

Supplement: pgen.0020116.sg003.pdf [file pgen.0020116.sg003.pdf]

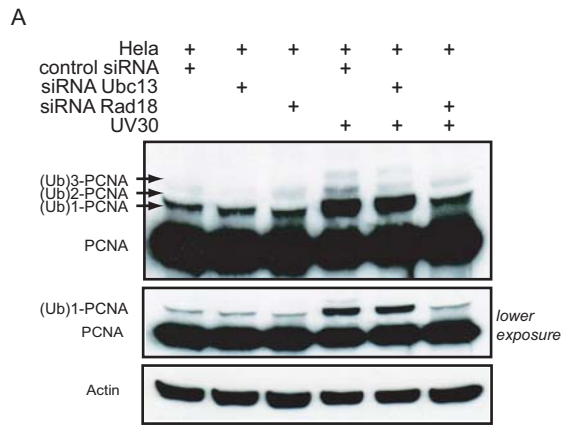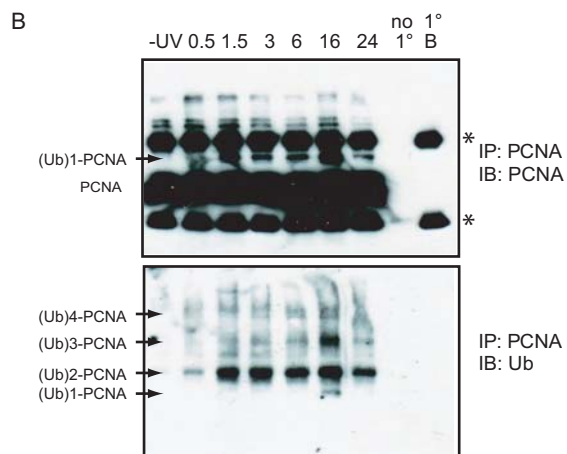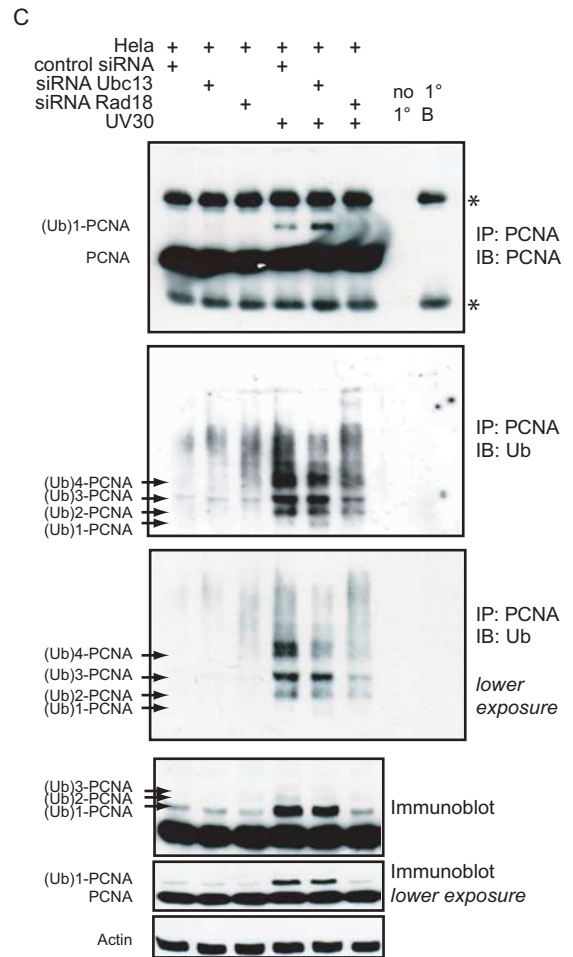

Supplementary Figure S4 *Chiu et al*

Supplement: pgen.0020116.sg004.pdf [file pgen.0020116.sg004.pdf]

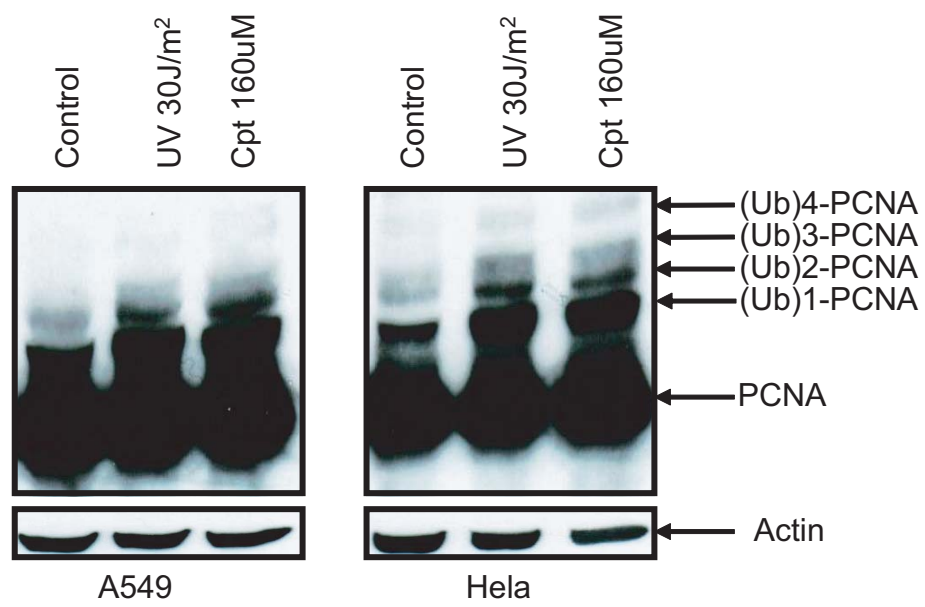

Supplementary Figure S5 *Chiu et al*

Supplement: pgen.0020116.sg005.pdf [file pgen.0020116.sg005.pdf]

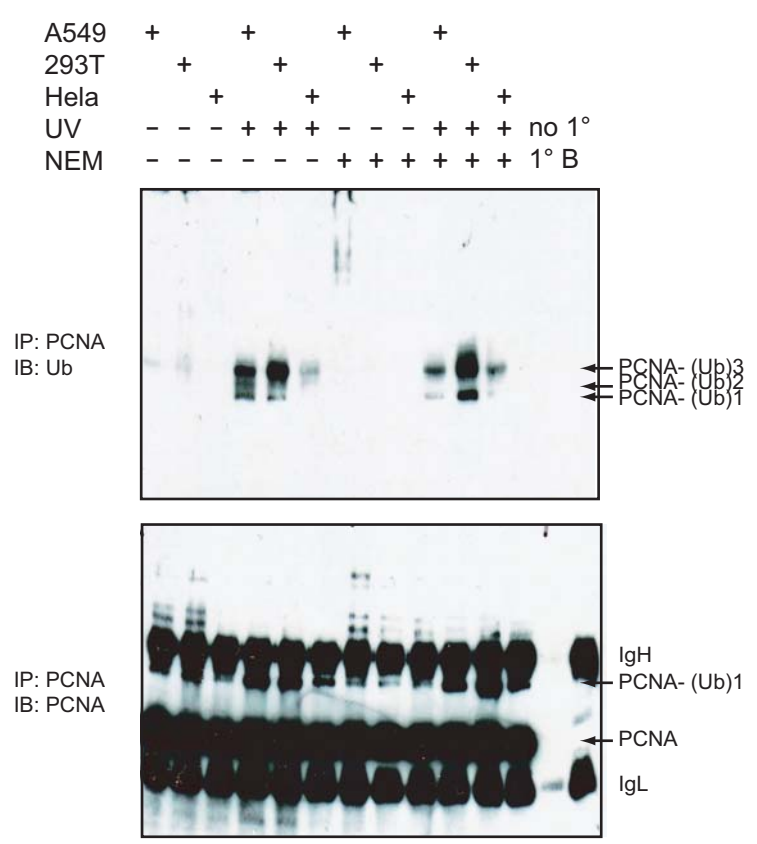

Supplementary Figure S6 *Chiu et al*

Supplement: pgen.0020116.sg006.pdf [file pgen.0020116.sg006.pdf]
